# Supplementary material for: The efficacy of dihydroartemisinin-piperaquine and artemether-lumefantrine with and without primaquine on Plasmodium vivax recurrence: A systematic review and individual patient data meta-analysis
Source: PLOS journal article supplement (doi:10.1371/journal.pmed.1002928), 2019-10-04
Supplement: S5 (10.1371/journal.pmed.1002928.s005) [file journal.pmed.1002928.s005]

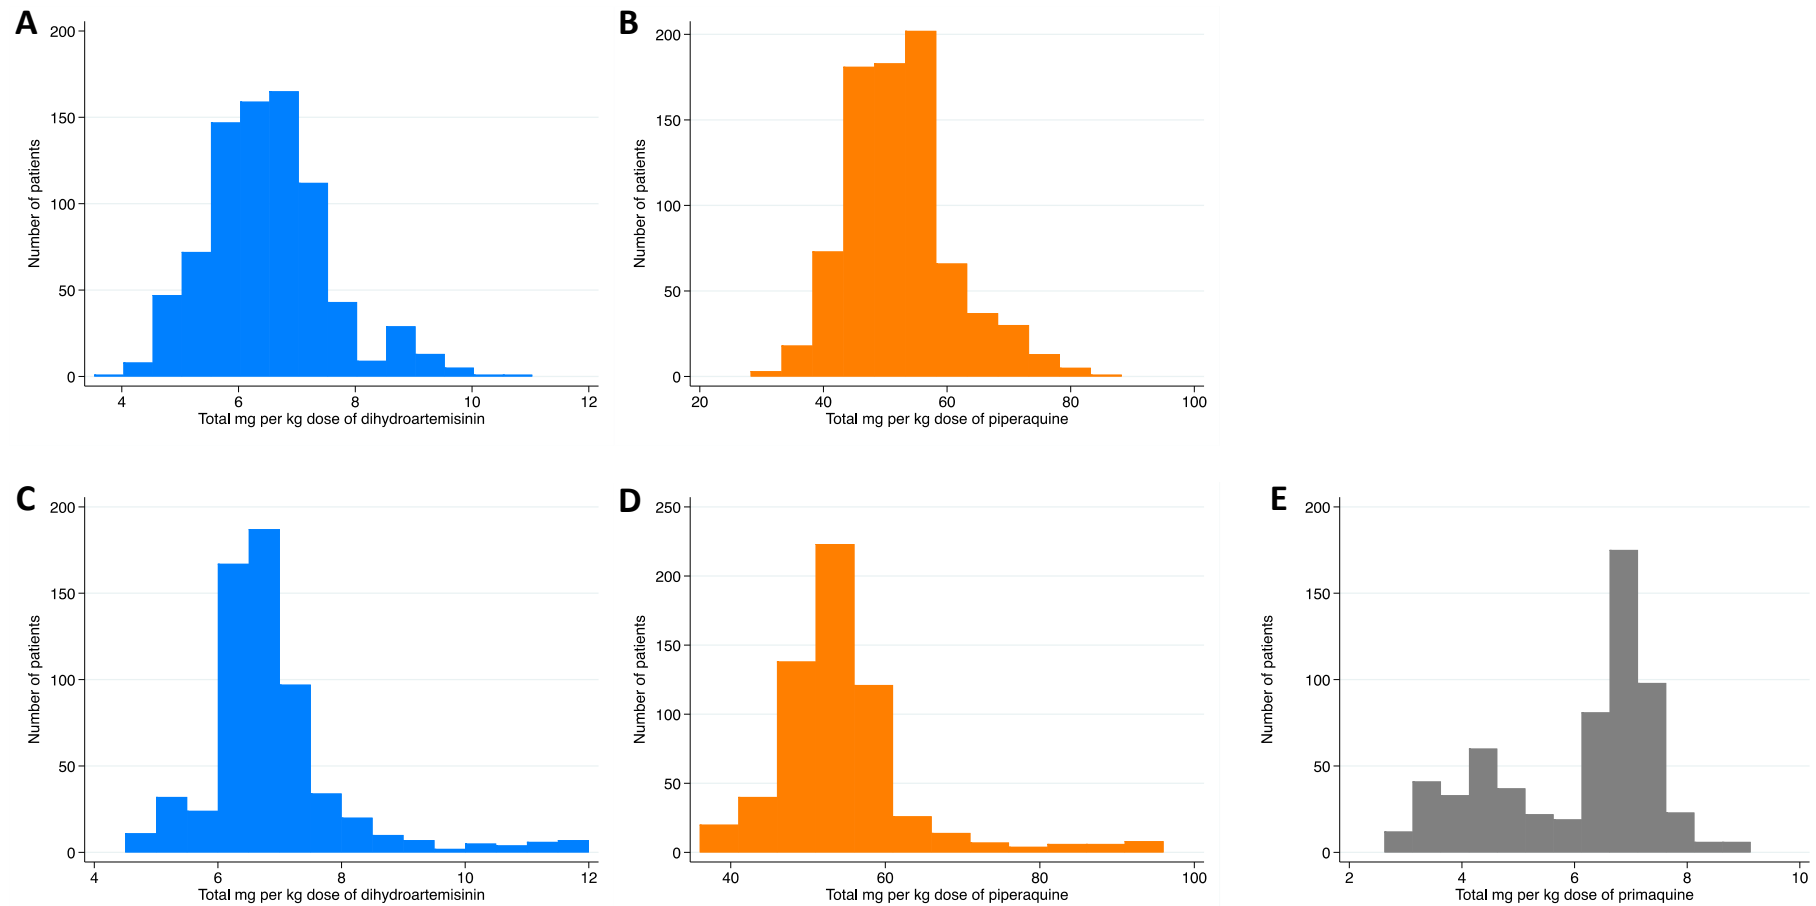

**S2 Fig. Histogram of drug dosing for (A) dihydroartemisinin in patients receiving dihydroartemisinin-piperazine alone (n=812), (B) piperazine in patients receiving dihydroartemisinin-piperazine alone (n=812), (C) dihydroartemisinin in patients receiving dihydroartemisinin-piperazine plus early primaquine (n=613), (D) piperazine in patients receiving dihydroartemisinin-piperazine plus early primaquine (n=613) and (E) primaquine in patients receiving dihydroartemisinin-piperazine plus early primaquine (n=613).**
